# Supplementary material for: Blood Exosomes Have Neuroprotective Effects in a Mouse Model of Parkinson’s Disease
Source: Hindawi journal article supplement (doi:10.1155/2020/3807476), 2020-11-26
Supplement: f1 [file 3807476.f1.pdf]

**A**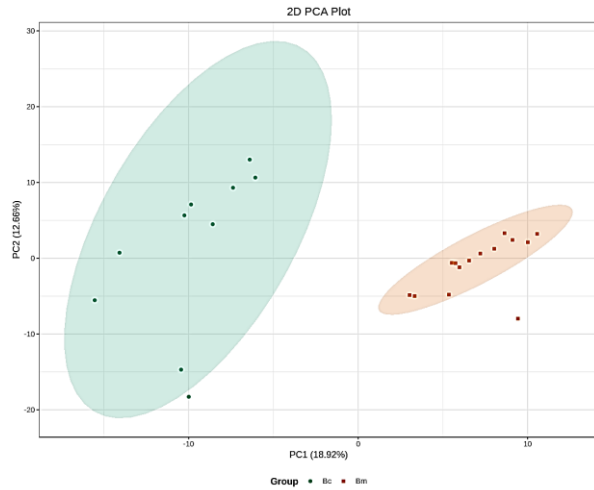**B**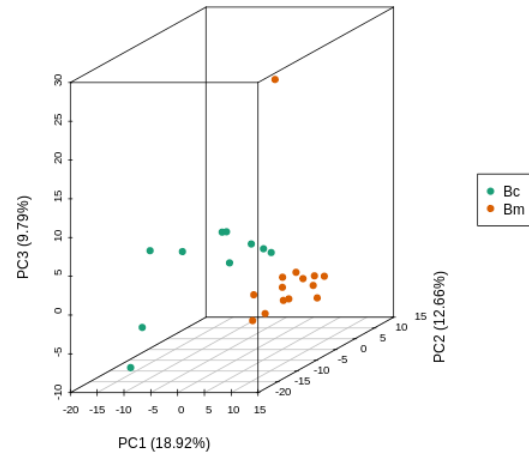**C**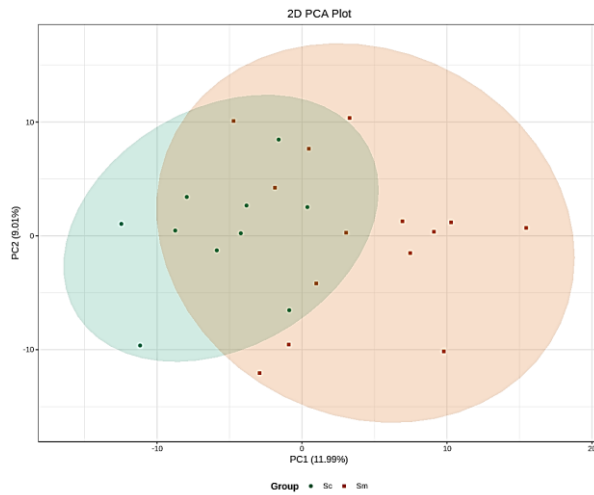**D**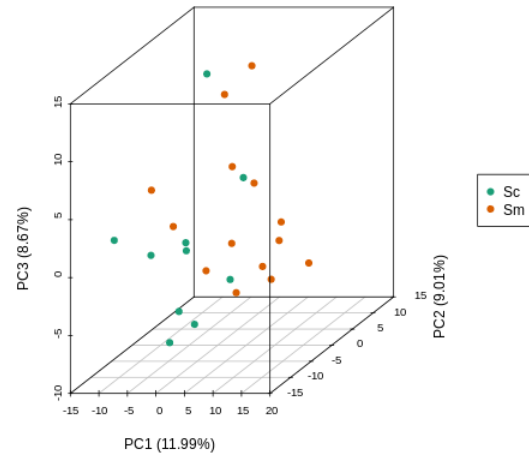

**Supplementary Figure 1 2D and 3D PCA Plots indicated different metabolic characteristics in serum and brain tissue.** PCA results showed the trend of metabolome separation among the sample groups, and observed the variation between the difference groups and between the samples in the group, indicating that the 2 groups had different metabolic characteristics. Analysis of 14 PD mice and 10 control mice. 2D PCA Plot of metabolites in the brain (A) and serum (C), 3D PCA Plot of metabolites in the brain (B) and serum (D).

## **Supplementary methods**

### **Sample preparation and extraction**

#### **Blood sample**

Sample was thawed on ice, 3 volumes of ice-cold methanol was added to 1 volume of plasma/serum, whirl the mixture for 3 min and centrifuge it with 12,000 rpm at 4 °C for 10 min. Then collect the supernatant and centrifuge it at 12,000 rpm at 4 °C for 5 min. Finally collect the supernatant again and it will be used for LC-MS/MS analysis.

#### **HPLC Conditions**

The sample extracts were analyzed using an LC-ESI-MS/MS system (UPLC, Shim-pack UFLC SHIMADZUCBM A system, <https://www.shimadzu.com/>; MS, QTRAP® System, <https://sciex.com/>). The analytical conditions were as follows, UPLC: column, Waters ACQUITY UPLC HSS T3 C18 (1.8 µm, 2.1 mm\*100 mm); column temperature, 40 °C; flow rate, 0.4 mL/min; injection volume, 2µL; solvent system, water (0.04% acetic acid): acetonitrile (0.04% acetic acid); gradient program, 95:5 V/V at 0 min, 5:95 V/V at 11.0 min, 5:95 V/V at 12.0 min, 95:5 V/V at 12.1 min, 95:5 V/V at 14.0 min.

#### **ESI-QTRAP-MS/MS**

LIT and triple quadrupole (QQQ) scans were acquired on a triple quadrupole-linear ion trap mass spectrometer (QTRAP), QTRAP® LC-MS/MS System, equipped with an ESI Turbo Ion-Spray interface, 30 operating in positive and negative ion mode and controlled by Analyst 1.6.3 software (Sciex). The ESI source operation parameters were as follows: source temperature 500 °C; ion spray voltage (IS) 5500 V (positive), -4500 V (negative); ion source gas I (GSI), gas II (GSII), curtain gas (CUR) were set at 55, 60, and 25.0 psi, respectively; the collision gas (CAD) was high. Instrument

tuning and mass calibration were performed with 10 and 100  $\mu\text{mol/L}$  polypropylene glycol solutions in QQQ and LIT modes, respectively. A specific set of MRM transitions were monitored for each period according to the metabolites eluted within this period.

**Supplementary Table 1 Information of Healthy volunteers**

| number | gender | age | Weight(kg) | Height(cm) |
|--------|--------|-----|------------|------------|
| 1      | male   | 19  | 57         | 164        |
| 2      | male   | 19  | 75         | 180        |
| 3      | male   | 18  | 73         | 185        |
| 4      | male   | 19  | 69         | 184        |
| 5      | male   | 18  | 70         | 177        |
| 6      | male   | 19  | 75         | 173        |
| 7      | male   | 19  | 55         | 172        |
| 8      | male   | 20  | 75         | 176        |
| 9      | male   | 18  | 60         | 165        |
| 10     | male   | 19  | 68         | 177        |

**Supplementary Table 2 69 differentially expressed metabolites in serum**

| Compounds                                             | Class                            | VIP      | p-value (t-text) | trend |
|-------------------------------------------------------|----------------------------------|----------|------------------|-------|
| (5-L-Glutamyl)-L-Amino Acid                           | Amino Acid metabolomics          | 1.50329  | 0.0308           | up    |
| Allantoin                                             | Organic Acid And Its Derivatives | 1.645435 | 0.0206           | up    |
| N-Acetylneuraminic Acid                               | Amino Acid metabolomics          | 2.810086 | <0.0001          | down  |
| Chenodeoxycholic Acid                                 | Bile Acids                       | 1.719309 | 0.0133           | up    |
| Dulcitol                                              | Carbohydrate metabolomics        | 1.508731 | 0.0283           | down  |
| Phenyllactate (Pla)                                   | Organic Acid And Its Derivatives | 2.503092 | <0.0001          | down  |
| Lysope 14:0                                           | LipidsOthersPhospholipid         | 1.481949 | 0.0218           | down  |
| 9,10-DiHOME [(±)9,10-dihydroxy-12Z-octadecenoic acid] | Oxidized lipid                   | 1.826174 | 0.0067           | up    |
| Cis-11,14,17-Eicosatrienoic Acid (C20:3)              | Lipids_Fatty Acids               | 1.56911  | 0.0203           | up    |
| (S)-(-)-2-Hydroxyisocaproic Acid                      | Organic Acid And Its Derivatives | 2.884665 | <0.0001          | down  |
| Neopterin                                             | Pteridines and derivatives       | 1.910464 | 0.005            | up    |
| Thiamine Triphosphate                                 | CoOthersEnzyme Factor &          | 1.879617 | 0.0046           | down  |

|                           |                                     |          |         |      |
|---------------------------|-------------------------------------|----------|---------|------|
|                           | vitamin                             |          |         |      |
| B-Hydroxypyruvic Acid     | Organic Acid And Its Derivatives    | 1.445567 | 0.0405  | up   |
| Fumaric Acid              | Amino Acid metabolomics             | 1.547576 | 0.0274  | up   |
| 2-Deoxyribose 1-Phosphate | Carbohydrate metabolomics           | 1.709251 | 0.01    | down |
| Formononetin              | Carbohydrate metabolomics           | 1.414999 | 0.0402  | up   |
| Pyrophosphate             | Organic Acid And Its Derivatives    | 2.516178 | <0.0001 | up   |
| 2,5-Furandicarboxylicacid | Organic Acid And Its Derivatives    | 1.617318 | 0.02    | up   |
| Methanesulfonic acid      | Others                              | 1.678012 | 0.0109  | down |
| L-Asparagine Anhydrous    | Amino Acid metabolomics             | 1.408834 | 0.0462  | up   |
| N-Acetyl-L-Glutamic Acid  | Amino Acid metabolomics             | 1.713156 | 0.0124  | down |
| P-Coumaraldehyde          | Benzene and substituted derivatives | 1.285275 | 0.0364  | up   |
| 4-Ethylbenzoic Acid       | Benzene and substituted derivatives | 1.945169 | 0.0041  | up   |
| 2-Picolinic Acid          | Pyridine And Pyridine Derivatives   | 1.332943 | 0.0481  | down |
| Acetylcholine Chloride    | Cholines                            | 2.392873 | 0.0001  | down |
| 1-Methylhistidine         | Amino Acid metabolomics             | 1.675852 | 0.0148  | down |
| 3'-Aenylic Acid           | Nucleotide metabolomics             | 1.853427 | 0.0036  | up   |
| Adenine                   | Nucleotide metabolomics             | 1.548782 | 0.0288  | down |
| Cytidine                  | Nucleotide metabolomics             | 1.749622 | 0.0252  | down |
| Epinephrine               | Hormones                            | 1.985023 | 0.0022  | up   |
| D-Galactose               | Carbohydrate metabolomics           | 1.572895 | 0.0348  | up   |
| D-Glucono-1,5-Lactone     | Carbohydrate metabolomics           | 2.446655 | <0.0001 | up   |
| Nicotinic Acid            | CoOthersEnzyme Factor & vitamin     | 1.906224 | 0.0066  | down |
| 1-Naphthylacetic Acid     | Organic Acid And Its Derivatives    | 1.490897 | 0.0181  | up   |
| 4-Guanidinobutyric Acid   | Organic Acid And Its Derivatives    | 1.933636 | 0.0029  | down |
| Azelaic Acid              | Organic Acid And Its Derivatives    | 1.544053 | 0.0243  | up   |
| Creatinine                | Organic Acid And Its Derivatives    | 1.71423  | 0.0096  | down |
| Sebacate                  | Organic Acid And Its Derivatives    | 1.480941 | 0.0281  | up   |
| Acetaminophen Glucuronide | Carbohydrate metabolomics           | 1.224056 | 0.0384  | up   |
| H-Homoarg-Oh              | Amino Acid metabolomics             | 1.439723 | 0.0425  | down |
| Phosphoric Acid           | Organic Acid And Its Derivatives    | 1.950611 | 0.0039  | up   |
| Cholesterol               | Lipids                              | 2.80908  | <0.0001 | up   |

|                                       |                                     |          |         |      |
|---------------------------------------|-------------------------------------|----------|---------|------|
| 2-Aminoadipic Acid                    | Organic Acid And Its Derivatives    | 1.347489 | 0.0482  | down |
| Ergothioneine                         | Organic Acid And Its Derivatives    | 2.086389 | 0.0009  | down |
| Hexadecanamide                        | Lipids_Fatty Acids                  | 1.291087 | 0.0274  | up   |
| (-)-trans-Caryophyllene               | Lipids_Fatty Acids                  | 1.548686 | 0.0132  | up   |
| Triethyl phosphate                    | Organic Acid And Its Derivatives    | 2.413266 | 0.0001  | down |
| 2-Pyrrolidinone                       | Benzene and substituted derivatives | 1.474133 | 0.0402  | up   |
| 18-Hydroxycorticosterone              | Lipids                              | 2.63333  | <0.0001 | down |
| Dimethyl fumarate                     | Lipids_Fatty Acids                  | 2.189748 | 0.0006  | down |
| 1,2-Dichloroethane                    | Hydrocarbon derivative              | 2.825226 | <0.0001 | up   |
| Methyl tetradecanoate                 | Fatty acyls                         | 1.463476 | 0.0436  | down |
| Methyl $\beta$ -D-galactopyranoside   | Carbohydrate metabolomics           | 2.257974 | 0.0005  | up   |
| (E)-2-Octen-1-ol                      | Alcohol                             | 1.769306 | 0.0077  | down |
| 3-Hydroxy-4,5-dimethyl-2(5H)-furanone | Heterocyclic compound               | 1.568378 | 0.0275  | down |
| Methylisobutyrate                     | Organic Acid And Its Derivatives    | 1.436357 | 0.0286  | down |
| N-Nitrosodiethylamine                 | Polyamine                           | 1.428245 | 0.0218  | down |
| Barbituric acid                       | Heterocyclic compound               | 1.554395 | 0.0277  | down |
| carene                                | Heterocyclic compound               | 2.232867 | 0.0004  | up   |
| Hexyl $\beta$ -Acetate                | Fatty acyls                         | 1.79975  | 0.0087  | up   |
| 2,4,6-Trimethylphenol                 | Phenols And Its Derivatives         | 2.660509 | <0.0001 | down |
| Terpinolene                           | Terpenoid                           | 2.707682 | <0.0001 | down |
| alpha-Terpinene                       | Terpenoid                           | 1.858838 | 0.0056  | up   |
| Octanal                               | Aldehyde                            | 1.481981 | 0.0278  | down |
| 1-butanol                             | Alcohol                             | 2.034277 | 0.0031  | up   |
| Naphthalene                           | Benzene and substituted derivatives | 1.663639 | 0.0121  | down |
| N $\alpha$ -Acetyl-L-glutamine        | Amino Acid metabolomics             | 1.469021 | 0.039   | down |
| L-Glutamic acid                       | Amino Acid metabolomics             | 2.613966 | <0.0001 | down |
| Oleate                                | Lipids                              | 1.217311 | 0.0405  | up   |

**Supplementary Table 3 148 differentially expressed metabolites in brain**

| Compounds                   | Class                   | VIP       | p-value (t-text) | trend |
|-----------------------------|-------------------------|-----------|------------------|-------|
| (5-L-Glutamyl)-L-Amino Acid | Amino Acid metabolomics | 1.0164394 | 0.0183           | up    |
| L-Cysteine                  | Amino Acid metabolomics | 1.9618505 | <0.0001          | up    |
| Benzoic Acid                | Benzene and substituted | 1.583751  | 0.0006           | down  |

|                                                       |                                     |           |         |      |
|-------------------------------------------------------|-------------------------------------|-----------|---------|------|
|                                                       | derivatives                         |           |         |      |
| Terephthalic Acid                                     | Benzene and substituted derivatives | 2.0292459 | <0.0001 | down |
| Tauroursodeoxycholic Acid                             | Bile Acids                          | 1.7769221 | <0.0001 | down |
| Taurochenodesoxycholic Acid                           | Bile Acids                          | 1.8423374 | <0.0001 | down |
| Phenethylamine                                        | Polyamine                           | 1.6678391 | 0.0002  | down |
| Dulcitol                                              | Carbohydrate metabolomics           | 1.9315324 | <0.0001 | down |
| Inosine                                               | Nucleotide metabolomics             | 1.0822141 | 0.0204  | down |
| 3-Indolebutyric Acid                                  | Indole And Its Derivatives          | 1.2947812 | 0.0063  | down |
| Guanidinoethyl Sulfonate                              | Organic Acid And Its Derivatives    | 1.1777579 | 0.0179  | down |
| Methylmalonic Acid                                    | Organic Acid And Its Derivatives    | 1.0642954 | 0.0141  | down |
| Phenyllactate (Pla)                                   | Organic Acid And Its Derivatives    | 1.0879774 | 0.0039  | down |
| Lysope 18:1                                           | LipidsOthersPhospholipid            | 1.3555931 | 0.021   | up   |
| Lysope 18:0                                           | LipidsOthersPhospholipid            | 1.5472096 | 0.002   | up   |
| Lysope 16:0                                           | LipidsOthersPhospholipid            | 1.6538966 | 0.0002  | up   |
| 9,10-DiHOME [(±)9,10-dihydroxy-12Z-octadecenoic acid] | Oxidized lipid                      | 1.367845  | 0.0027  | down |
| Palmitoleic Acid (C16:1)                              | Lipids_Fatty Acids                  | 2.0376123 | <0.0001 | down |
| Hexadecanoic Acid (C16:0)                             | Lipids_Fatty Acids                  | 1.7966922 | <0.0001 | down |
| Linoleic Acid (C18:2N6C)                              | Lipids_Fatty Acids                  | 1.8432175 | <0.0001 | down |
| Dodecanoic Acid(C12:0)                                | Lipids_Fatty Acids                  | 1.2862649 | 0.0102  | down |
| Cis-11,14,17-Eicosatrienoic Acid (C20:3)              | Lipids_Fatty Acids                  | 2.0246571 | <0.0001 | down |
| (S)-(-)-2-Hydroxyisocaproic Acid                      | Organic Acid And Its Derivatives    | 1.7145603 | 0.0002  | down |
| Neopterin                                             | Pteridines and derivatives          | 2.0074686 | <0.0001 | down |
| Hypoxanthine-9-β-D-Arabinofuranoside                  | Nucleotide metabolomics             | 1.075642  | 0.0198  | down |
| N-Acetylmethionine                                    | Amino Acid metabolomics             | 1.0704085 | 0.0184  | down |
| 2-(4-Hydroxyphenyl)ethanol                            | Benzene and substituted derivatives | 1.6027679 | 0.0006  | down |

|                                                                     |                                     |           |         |      |
|---------------------------------------------------------------------|-------------------------------------|-----------|---------|------|
| cis-7-Hexadecenoic Acid                                             | Lipids_Fatty Acids                  | 1.672489  | 0.0004  | down |
| cis-4-Hydroxy-D-proline                                             | Organic Acid And Its Derivatives    | 1.1026618 | 0.0265  | down |
| Glycerol 3-phosphate                                                | Lipids_Fatty Acids                  | 1.0627641 | 0.0458  | down |
| Salicylic acid                                                      | Organic Acid And Its Derivatives    | 1.561779  | 0.0007  | down |
| D-Arabinose 5-phosphate                                             | Carbohydrate metabolomics           | 1.7115129 | 0.0003  | down |
| Anthranilic acid                                                    | Benzene and substituted derivatives | 1.9876917 | <0.0001 | down |
| Indoleacetaldehyde                                                  | Indole And Its Derivatives          | 1.3032201 | 0.002   | down |
| D-Xylulose 5-phosphate                                              | Carbohydrate metabolomics           | 1.4356481 | 0.0029  | down |
| Vanillylmandelic acid                                               | Benzene and substituted derivatives | 1.2943917 | 0.005   | down |
| PE(18:1(9Z)/0:0)                                                    | Lipids_Fatty Acids                  | 1.3210476 | 0.0257  | up   |
| Sorbic acid                                                         | Organic Acid And Its Derivatives    | 1.1479028 | 0.0181  | down |
| Decanal                                                             | Aldehyde                            | 1.8000527 | <0.0001 | down |
| Methyl hexadecanoate                                                | Fatty acyls                         | 1.0311394 | 0.0458  | down |
| 4-tert-Octylphenol                                                  | Phenols And Its Derivatives         | 1.5341323 | 0.0003  | up   |
| PHENYL-BETA-D-GLUCOPYRANOSIDE                                       | Carbohydrate metabolomics           | 1.5244368 | 0.001   | down |
| 2,4-Di-tert-butylphenol                                             | Phenols And Its Derivatives         | 1.5008474 | 0.0007  | up   |
| Methylparaben                                                       | Benzoic Acid And Its Derivatives    | 1.889514  | <0.0001 | down |
| (±)4-HDHA [(±)4-hydroxy-5E,7Z,10Z,13Z,16Z,19Z-docosahexaenoic acid] | Oxidized lipid                      | 1.0214453 | 0.0369  | down |
| 9-oxoODE [9-oxo-10E,12Z-octadecadienoic acid]                       | Oxidized lipid                      | 1.6989341 | <0.0001 | down |
| Nonadecylic acid                                                    | Lipids_Fatty Acids                  | 1.1886492 | 0.0216  | up   |
| N-Amidino-L-Aspartate                                               | Amino Acid metabolomics             | 1.2933802 | 0.0029  | down |
| Mono-Methyl Glutarate                                               | Organic Acid And Its Derivatives    | 1.4123594 | 0.0027  | down |
| L-Tyrosine                                                          | Amino Acid metabolomics             | 1.1898205 | 0.0044  | down |
| L-Alanine                                                           | Amino Acid metabolomics             | 1.3159752 | 0.0021  | down |
| L-Isoleucine                                                        | Amino Acid metabolomics             | 1.0373214 | 0.0138  | down |
| L-Pyroglutamic Acid                                                 | Amino Acid metabolomics             | 1.2551514 | 0.0037  | down |
| L-Valine                                                            | Amino Acid metabolomics             | 1.1797078 | 0.0097  | down |
| Betaine                                                             | Alkaloid                            | 1.0051541 | 0.0381  | down |

|                                   |                                     |           |         |      |
|-----------------------------------|-------------------------------------|-----------|---------|------|
| Phe-Phe                           | Amino Acid metabolomics             | 1.9414226 | <0.0001 | down |
| Methyleugenol                     | Benzene and substituted derivatives | 1.1025906 | 0.0261  | up   |
| P-Coumaric Acid                   | Benzene and substituted derivatives | 1.2419421 | 0.0035  | down |
| 2,5-Dihydroxy Benzoic Acid        | Benzene and substituted derivatives | 1.7688403 | <0.0001 | down |
| (3,4-Dimethoxyphenyl) Acetic Acid | Benzene and substituted derivatives | 1.1182145 | 0.0119  | down |
| 4-Ethylbenzoic Acid               | Benzene and substituted derivatives | 1.9700551 | <0.0001 | down |
| Phthalic Acid                     | Benzene and substituted derivatives | 1.0076797 | 0.0182  | down |
| 2-Picolinic Acid                  | Pyridine And Pyridine Derivatives   | 1.325756  | 0.0032  | down |
| Choline                           | Cholines                            | 1.1810585 | 0.0287  | down |
| Adenine                           | Nucleotide metabolomics             | 1.3231114 | 0.0064  | down |
| Adenosine                         | Nucleotide metabolomics             | 1.2286294 | 0.0098  | down |
| Guanosine                         | Nucleotide metabolomics             | 1.2234202 | 0.0169  | down |
| D-Sorbitol                        | Carbohydrate metabolomics           | 1.2278681 | 0.0078  | down |
| D-Glucose                         | Carbohydrate metabolomics           | 1.5629465 | 0.0007  | down |
| D-Glucono-1,5-Lactone             | Carbohydrate metabolomics           | 1.4656916 | 0.0013  | up   |
| L-Ascorbate                       | CoOthersEnzyme Factor & vitamin     | 1.0642737 | 0.0466  | down |
| Nicotinamide                      | CoOthersEnzyme Factor & vitamin     | 1.470342  | 0.0065  | up   |
| Nicotinic Acid                    | CoOthersEnzyme Factor & vitamin     | 1.0847247 | 0.0124  | down |
| Indole-3-Acetic Acid              | Indole And Its Derivatives          | 1.0119226 | 0.016   | down |
| 1-Naphthylacetic Acid             | Organic Acid And Its Derivatives    | 1.612702  | 0.0008  | up   |
| 6-Aminocaproic Acid               | Organic Acid And Its Derivatives    | 1.1093408 | 0.0111  | down |
| 7-Methyluric Acid                 | Organic Acid And Its Derivatives    | 1.055454  | 0.0255  | down |
| Homovanillic Acid                 | Organic Acid And Its Derivatives    | 1.1525094 | 0.0057  | down |
| Hydrocinnamic Acid                | Organic Acid And Its Derivatives    | 1.7117998 | <0.0001 | up   |
| Lysopc 16:0                       | LipidsOthersPhospholipid            | 1.1967527 | 0.0378  | up   |
| Lysopc 18:0                       | LipidsOthersPhospholipid            | 1.3642159 | 0.0163  | up   |
| 4-Hydroxybenzaldehyde             | Benzene and substituted derivatives | 1.1608982 | 0.0049  | down |



|                                       |                                     |           |         |      |
|---------------------------------------|-------------------------------------|-----------|---------|------|
| Taurocholic Acid Sodium Salt Hydrate  | Organic Acid And Its Derivatives    | 1.4287535 | 0.0015  | up   |
| 2-(Formylamino)Benzoic Acid           | Benzene and substituted derivatives | 1.001325  | 0.0189  | down |
| N-Acetylglycine                       | Amino Acid metabolomics             | 1.1129735 | 0.0158  | down |
| 7-Methylguanine                       | Nucleotide metabolomics             | 1.012108  | 0.0174  | down |
| Pantetheine                           | CoOthersEnzyme Factor & vitamin     | 1.5871872 | <0.0001 | down |
| 5'-Deoxy-5'-(Methylthio) Adenosine    | Nucleotide metabolomics             | 1.3988769 | 0.0023  | down |
| Trans-Citric Acid                     | Organic Acid And Its Derivatives    | 1.6743321 | 0.0001  | down |
| 6-Phosphogluconic Acid Trisodium Salt | Carbohydrate metabolomics           | 1.2538245 | 0.0158  | up   |
| Cholesterol                           | Lipids                              | 2.2263354 | <0.0001 | up   |
| Indole                                | Indole And Its Derivatives          | 1.4597394 | 0.0027  | up   |
| Piperidine                            | Benzene and substituted derivatives | 1.0601314 | 0.0089  | down |
| 2-Methylguanosine                     | Nucleotide metabolomics             | 1.0686127 | 0.0102  | down |
| 2-Hydroxycinnamic acid                | Benzene and substituted derivatives | 1.1314423 | 0.0064  | down |
| DL-o-Tyrosine                         | Organic Acid And Its Derivatives    | 1.1758803 | 0.0051  | down |
| Hexadecanamide                        | Lipids_Fatty Acids                  | 1.3047565 | 0.0301  | up   |
| N-Acetyl-L-alanine                    | Organic Acid And Its Derivatives    | 1.7793308 | <0.0001 | down |
| Triethyl phosphate                    | Organic Acid And Its Derivatives    | 2.1408865 | <0.0001 | down |
| PAF C-16                              | Lipids                              | 1.4522904 | 0.0074  | up   |
| alpha-Cadinene                        | Lipids_Fatty Acids                  | 1.4098875 | 0.0014  | down |
| 2'-Hydroxy-5'-methylacetophenone      | Benzene and substituted derivatives | 1.3144818 | 0.005   | up   |
| 2-(3,4-dimethoxyphenyl)ethanamine     | Benzene and substituted derivatives | 1.1648478 | 0.005   | down |
| beta-Cubebene                         | Lipids_Fatty Acids                  | 1.3413787 | 0.0014  | down |
| Benzylcinnamate                       | Benzene and substituted derivatives | 1.0589763 | 0.0169  | up   |
| Isoamyl butyrate                      | Fatty acyls                         | 1.1725654 | 0.0177  | down |
| Ethyl dodecanoate                     | Fatty acyls                         | 2.0857838 | <0.0001 | up   |
| Propylpropionate                      | Fatty acyls                         | 1.0867356 | 0.0269  | down |
| 1,2-Dichloroethane                    | Hydrocarbon derivative              | 1.3193694 | 0.0062  | up   |

|                                |                                     |           |         |      |
|--------------------------------|-------------------------------------|-----------|---------|------|
| Cyclohexanone                  | Ketones                             | 1.8072582 | <0.0001 | down |
| Butyl 3-methylbutanoate        | Fatty acyls                         | 1.049239  | 0.0452  | down |
| Ethyl decanoate                | Fatty acyls                         | 1.8440143 | <0.0001 | down |
| 2,2,2-Trichloroethanol         | Alcohol                             | 1.3925061 | 0.0032  | down |
| Methylcysteine                 | Amino Acid metabolomics             | 1.2062025 | 0.0044  | down |
| Benzophenone                   | Benzene and substituted derivatives | 1.040007  | 0.037   | down |
| TranexamicAcid                 | Organic Acid And Its Derivatives    | 1.26248   | 0.0198  | up   |
| (E)-2-Octen-1-ol               | Alcohol                             | 1.2463765 | 0.0071  | down |
| 2-Pentadecanone                | Ketones                             | 1.899365  | <0.0001 | up   |
| Methyl dihydrojasmonate        | Organic Acid And Its Derivatives    | 1.8285179 | <0.0001 | up   |
| 3,5-Dinitrosalicylic acid      | Organic Acid And Its Derivatives    | 1.5016205 | 0.001   | up   |
| 3-Methylthiophene              | Heterocyclic compound               | 1.7098025 | 0.0001  | down |
| Barbituric acid                | Heterocyclic compound               | 1.1967662 | 0.0072  | down |
| 2,4-Dichlorophenoxyacetic acid | Benzene and substituted derivatives | 2.1033977 | <0.0001 | up   |
| carene                         | Heterocyclic compound               | 2.123199  | <0.0001 | down |
| Hexyl?Acetate                  | Fatty acyls                         | 1.554381  | 0.0003  | down |
| Farnesol                       | Alcohol                             | 1.0594597 | 0.0177  | down |
| 2,4,6-Trimethylphenol          | Phenols And Its Derivatives         | 1.6415951 | 0.0002  | down |
| Terpinolene                    | Terpenoid                           | 1.4740649 | 0.0004  | down |
| (+)-borneol                    | Alcohol                             | 2.0544875 | <0.0001 | down |
| p-Menth-1-en-4-ol              | Terpenoid                           | 1.8839988 | <0.0001 | down |
| 2-Pentyl-3-phenyl-2-propenal   | Aldehyde                            | 2.122818  | <0.0001 | up   |
| Octanal                        | Aldehyde                            | 1.1290156 | 0.0196  | down |
| Pyrene                         | Benzene and substituted derivatives | 2.1075731 | <0.0001 | up   |
| MESITYL OXIDE                  | Ketones                             | 1.2746507 | 0.008   | down |
| METHYL VALERATE                | Fatty acyls                         | 1.8928732 | <0.0001 | down |
| 1-PENTADECANOL                 | Alcohol                             | 1.7215666 | <0.0001 | up   |
| DIISOBUTYL PHTHALATE           | Benzene and substituted derivatives | 1.3033899 | 0.0032  | down |
| Dibutyl phthalate              | Benzene and substituted derivatives | 1.0487835 | 0.0207  | down |
| Naphthalene                    | Benzene and substituted derivatives | 1.2552856 | 0.0057  | down |
| ETHYL ISOBUTYRATE              | Fatty acyls                         | 1.2435101 | 0.0083  | down |
| Choline chloride               | Others                              | 1.1436045 | 0.0056  | down |

|                                 |                                     |           |         |      |
|---------------------------------|-------------------------------------|-----------|---------|------|
| caprate (10:0)                  | Lipids                              | 1.4901922 | 0.0018  | down |
| Isobutyl decanoate              | Fatty acyls                         | 1.838032  | <0.0001 | up   |
| proline betaine                 | Organic Acid And Its Derivatives    | 1.1284421 | 0.0237  | down |
| Bisphenol propane               | Benzene and substituted derivatives | 2.1486378 | <0.0001 | up   |
| N-methylalanine                 | Amino Acid metabolomics             | 1.052861  | 0.022   | down |
| 2'-Deoxycytidine 5'-Diphosphate | Nucleotide metabolomics             | 1.286858  | 0.0183  | up   |
| Dethiobiotin                    | Others                              | 1.81189   | <0.0001 | down |
